# Supplementary material
Source: PubMed Central journal article supplement (PMC3610810)
Supplement: NIHMS441902-supplement-1.pdf [file NIHMS441902-supplement-1.pdf]

Supplemental digital content for DeCastro R, Sambuco D, Ubel PA, Stewart A, Jagsi R. Mentor Networks in Academic Medicine: Moving Beyond a Dyadic Conception of Mentoring for Junior Faculty Researchers; for DeCastro R, Sambuco D, Ubel PA, Stewart A, Jagsi R. *Batting 300 is Good: Perspectives of Faculty Researchers and their Mentors on Rejection, Resilience, and Persistence in Academic Medical Careers*; for Sambuco D, Dabrowska A, DeCastro R, Stewart A, Ubel PA, Jagsi R. *Negotiation in Academic Medicine: Narratives of Faculty Researchers and Their Mentors*. *Acad Med*. 2013;88(4)

## Supplementary Digital Table 1

### Characteristics of 128 Participants in Interviews Exploring the Determinants of Success in Academic Medicine and the Challenges That Face Those Who Pursue Biomedical Research Careers, February 2010 – August 2011

| Interviewee Type       | No. (% of 128)  |
|------------------------|-----------------|
| <b>K-Awardee</b>       | <b>100 (78)</b> |
| <b>Mentor</b>          | <b>28 (22)</b>  |
| <b>Gender</b>          |                 |
| Women                  | 76 (59)         |
| Men                    | 52 (41)         |
| <b>Race-Ethnicity*</b> |                 |
| White/Caucasian        | 99 (77)         |
| Black/African-American | 7 (5)           |
| Hispanic/Latino        | 3 (2)           |
| Asian/Asian-American   | 18 (14)         |
| Not reported           | 5 (4)           |

\*Number exceeds 128 and percentage exceeds 100 because some participants were allowed to report more than one race/ethnicity.

Supplemental digital content for DeCastro R, Sambuco D, Ubel PA, Stewart A, Jagsi R. Mentor Networks in Academic Medicine: Moving Beyond a Dyadic Conception of Mentoring for Junior Faculty Researchers; for DeCastro R, Sambuco D, Ubel PA, Stewart A, Jagsi R. *Batting 300 is Good: Perspectives of Faculty Researchers and their Mentors on Rejection, Resilience, and Persistence in Academic Medical Careers*; for Sambuco D, Dabrowska A, DeCastro R, Stewart A, Ubel PA, Jagsi R. *Negotiation in Academic Medicine: Narratives of Faculty Researchers and Their Mentors*. *Acad Med*. 2013;88(4)

## Supplementary Digital Table 2

### Characteristics of 100 K-Award\* Recipients Participating in Interviews Exploring the Determinants of Success in Academic Medicine and the Challenges That Face Those Who Pursue Biomedical Research Careers, February 2010 – August 2011

| Characteristic                                                    | No. |
|-------------------------------------------------------------------|-----|
| <b>K award type</b>                                               |     |
| K08                                                               | 38  |
| K23                                                               | 62  |
| <b>Degree type</b>                                                |     |
| MD or DO                                                          | 56  |
| MD or DO with PhD                                                 | 16  |
| Other clinical doctorate                                          | 28  |
| <b>Specialty</b>                                                  |     |
| Medical                                                           | 40  |
| Surgical                                                          | 3   |
| Families, women, or children                                      | 15  |
| Hospital-based                                                    | 13  |
| Other <sup>†</sup>                                                | 28  |
| Not reported                                                      | 1   |
| <b>Institution type (at time of K award)</b>                      |     |
| Public                                                            | 45  |
| Private                                                           | 54  |
| Nonprofit                                                         | 1   |
| <b>Received post K-award funding from the NIH or other agency</b> |     |
| Yes                                                               | 38  |
| No                                                                | 62  |
| <b>Current career status</b>                                      |     |
| Academic institution                                              | 80  |
| Government                                                        | 2   |
| Independent research institution                                  | 1   |
| Industry                                                          | 7   |
| Nonprofit                                                         | 3   |
| Private practice                                                  | 7   |

\* K Awards are competitive grants that the National Institutes of Health grants to individuals holding clinical doctorates that afford them protected time, mentoring, and support in order to allow them to develop research careers

<sup>†</sup> Other includes dentistry, veterinary medicine, etc.
